# Supplementary material
Source: MDPI journal article supplement (https://www.mdpi.com/2073-4395/12/12/2939)
Supplement: s1 [file s1]

**Supplementary Table S1.** Gene accession number and primer sequence used for qRT-PCR analysis.

| Gene           | Accession number | Orientation | Primer sequence (5'→3') |
|----------------|------------------|-------------|-------------------------|
| <i>DaActin</i> | Dioal.1537s0038  | F           | CAGCAGTTAAGTCGGTGTTC    |
|                |                  | R           | TACAACAACCCGGAATCAT     |
| <i>DaFT1</i>   | Dioal.1360s0021  | F           | TCGCGTATTCTACACTCTTGTGA |
|                |                  | R           | GATGGTTTTTGTACTGTTCAAGC |
| <i>DaFT2</i>   | Dioal.1602s0029  | F           | TCTGTTTGCGCAACTTTGTT    |
|                |                  | R           | GCATAGCTTGATATGCCTGGA   |

Accession numbers refer to *Dioscorea alata* v1.1, Phytozome ver.13

**Supplementary Table S2.** The information of FT-like genes in water yam

| Gene         | Accession       | Functional Annotations                                                   |
|--------------|-----------------|--------------------------------------------------------------------------|
| <i>DaFT1</i> | Dioal.1360s0021 | Protein FLOWERING LOCUS T; Phosphatidylethanolamine-binding protein PEBP |
| <i>DaFT2</i> | Dioal.1602s0029 | Phosphatidylethanolamine-binding protein PEBP                            |

Accession numbers refer to *Dioscorea alata* v1.1, Phytozome ver.13
